# Supplementary material
Source: PubMed Central journal article supplement (PMC6377281)
Supplement: NIHMS998143-supplement-Supplementary_figures.pdf [file NIHMS998143-supplement-Supplementary_figures.pdf]

Fig. S1

A

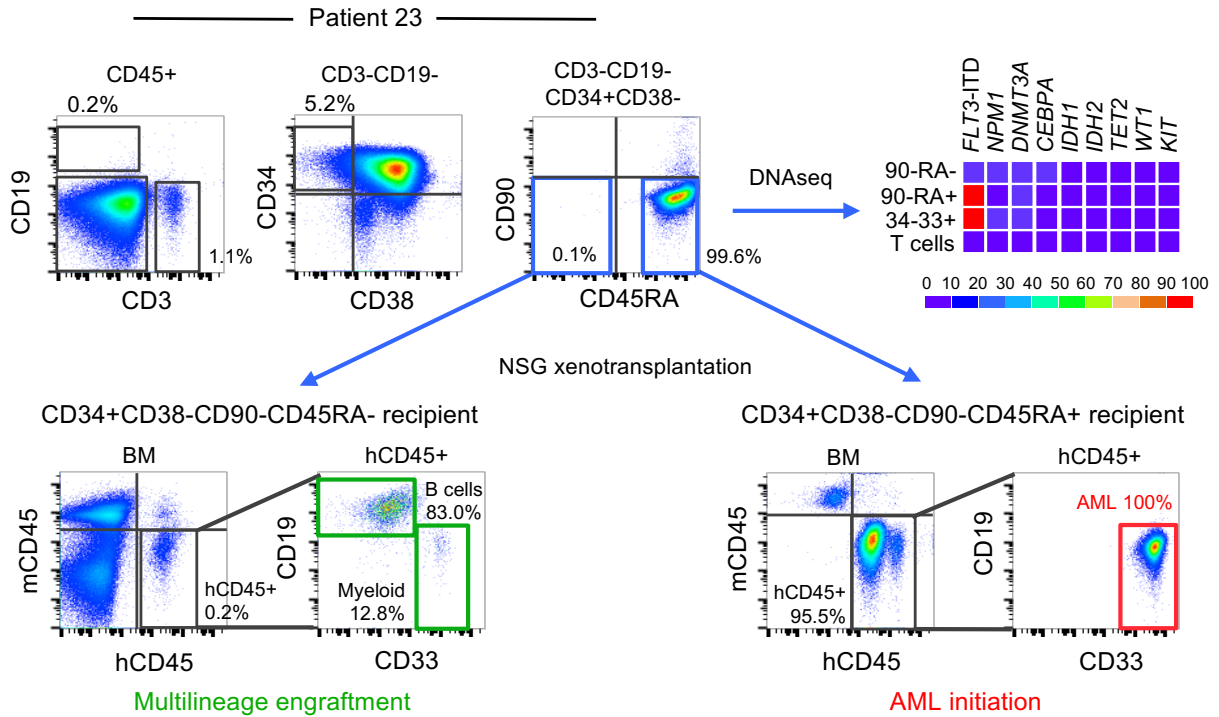

B

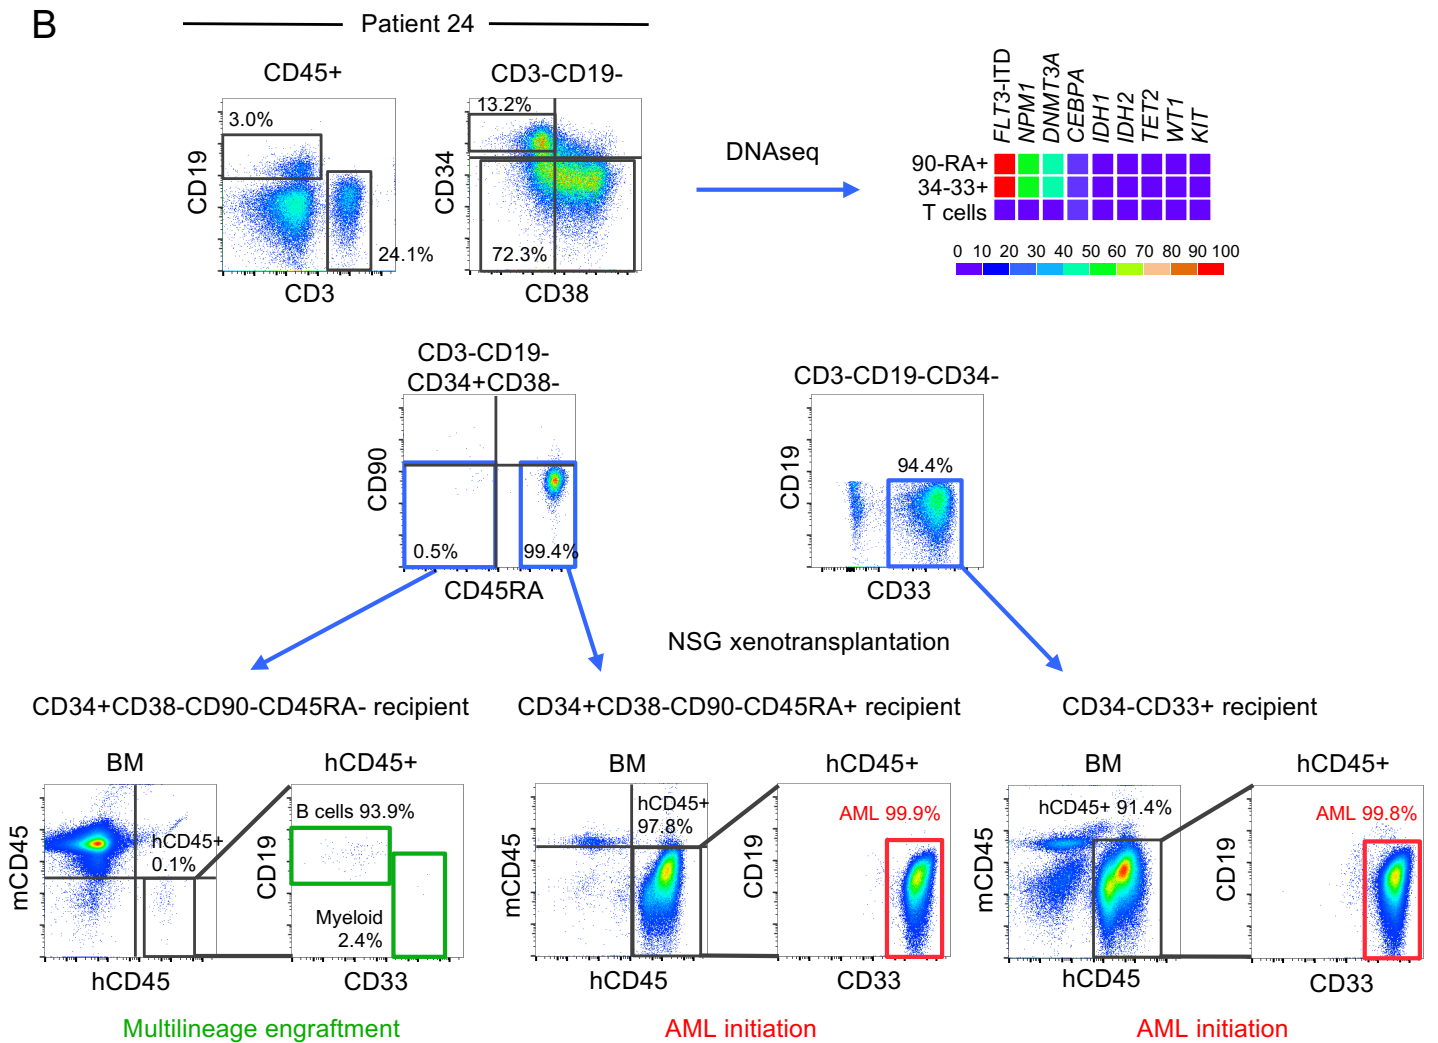

Fig. S1

C

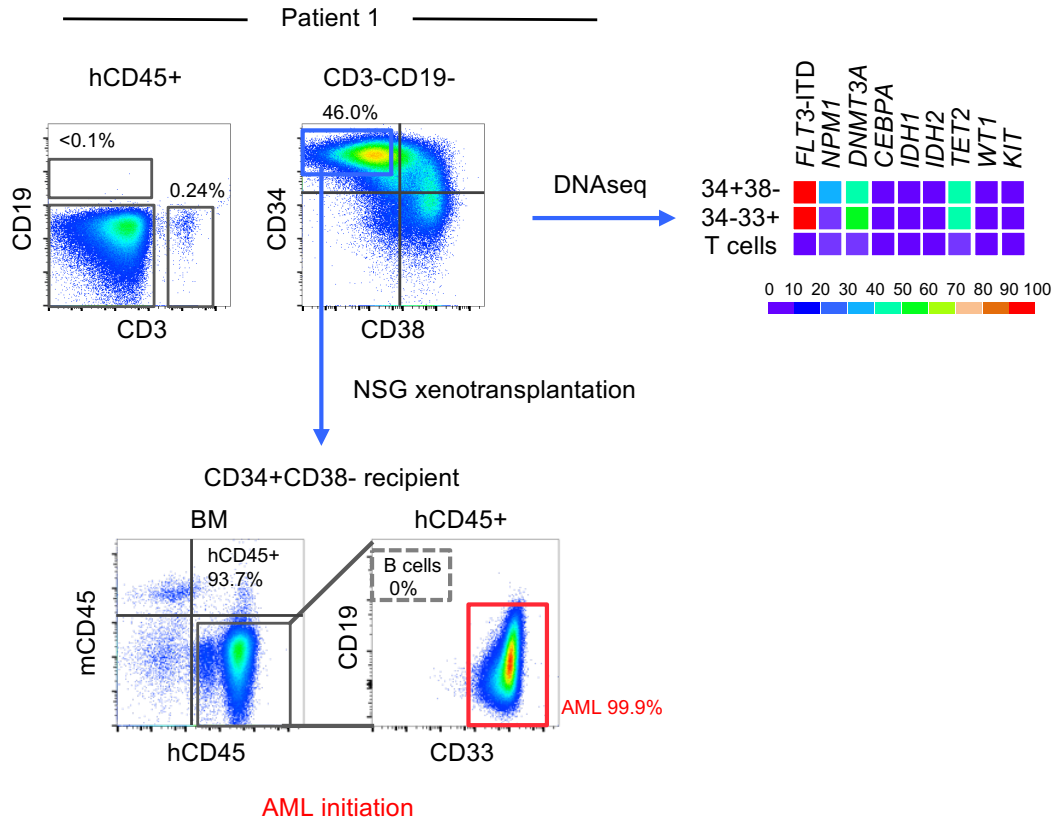

Fig. S2

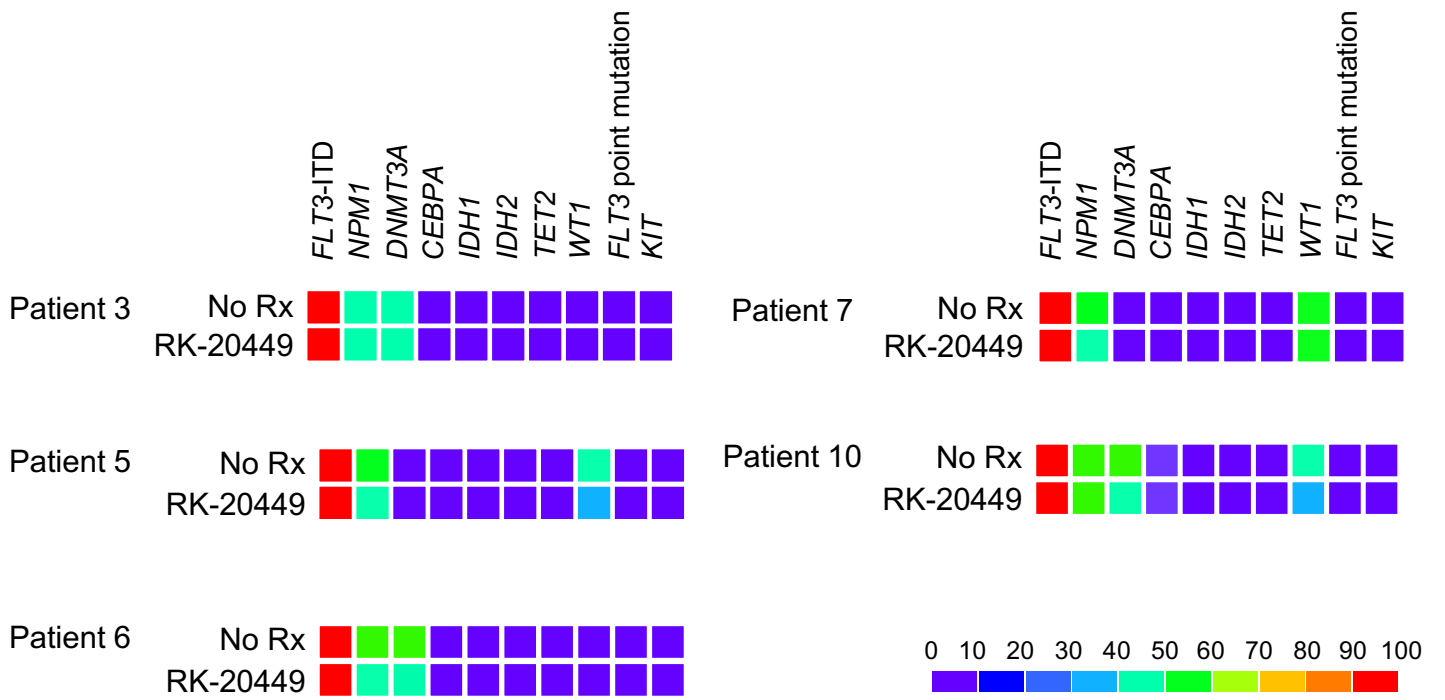

Fig. S3

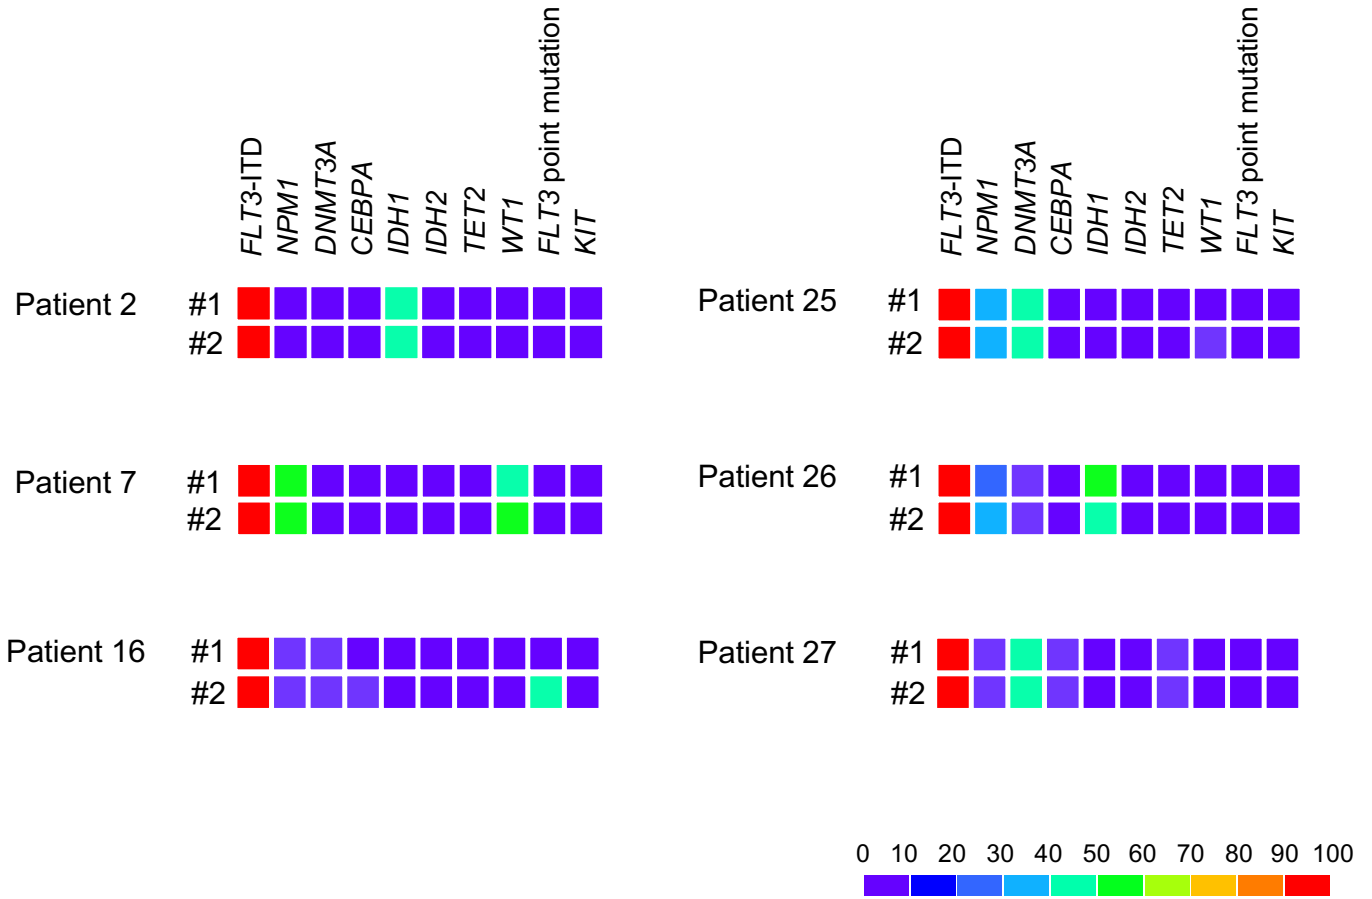

Fig. S4

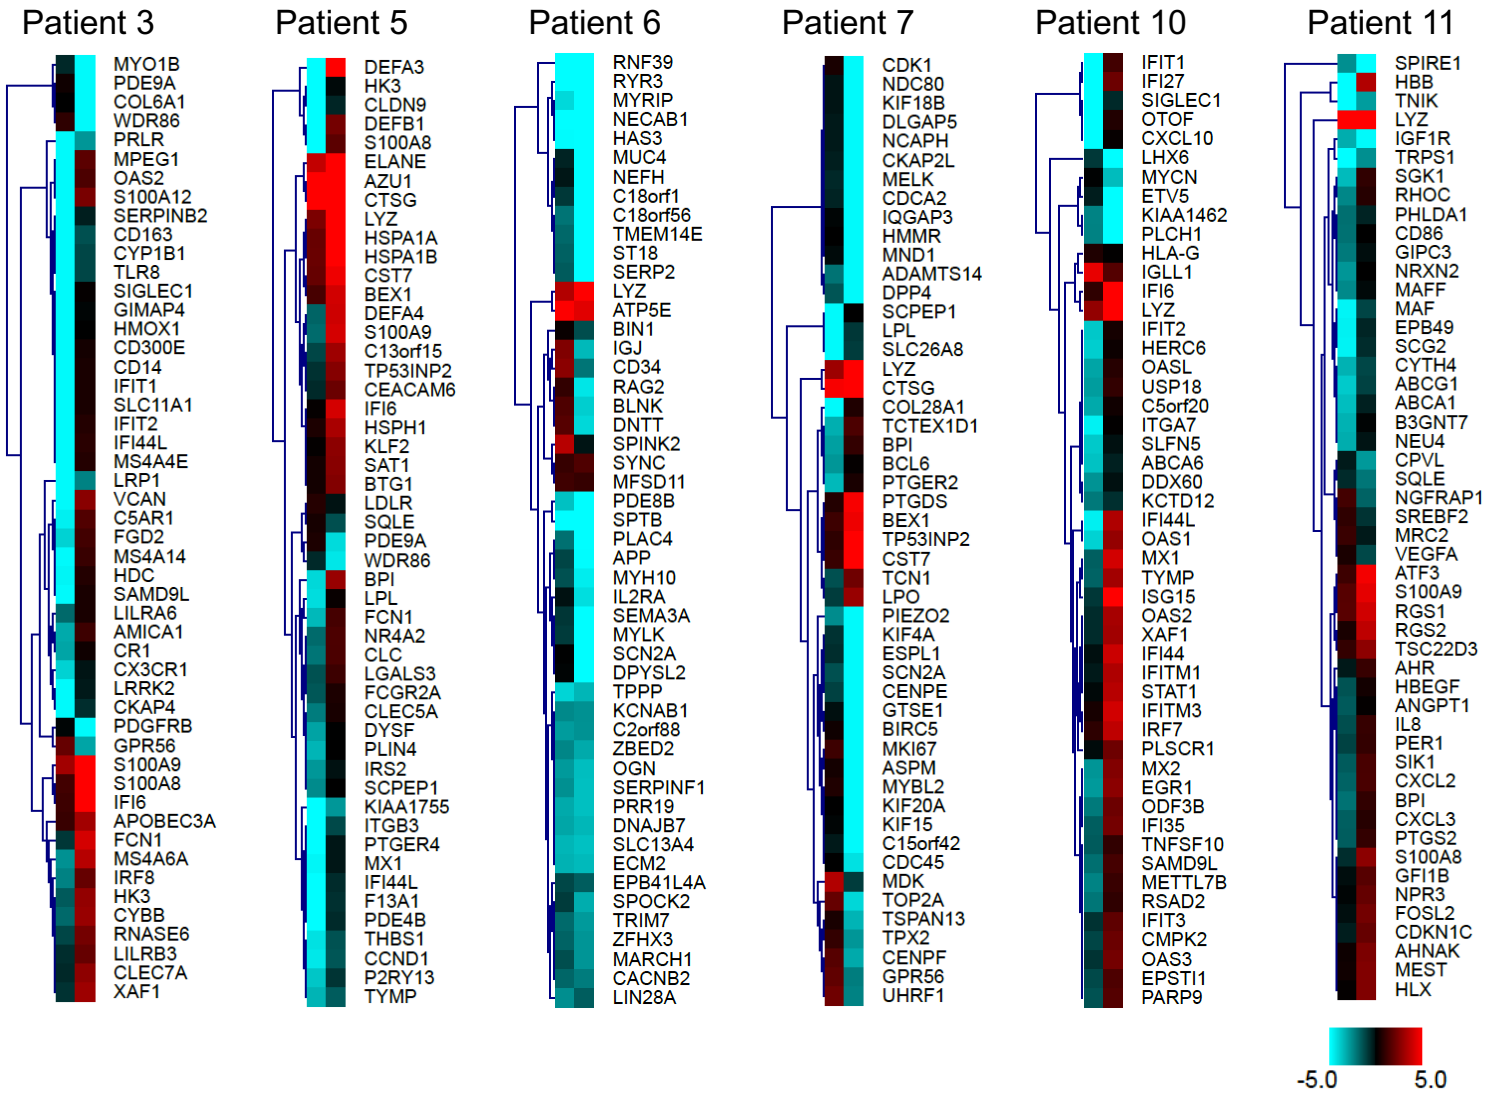

Left column: Untreated recipient

Right column: In vivo RK-20449 treated recipient
